# Supplementary material
Source: publisher site journal article supplement (https://www.dovepress.com/article/222664)
Supplement: Supplementary file 1 [file get_supplementary_file.php]

**Supplementary table 1** Modified Medical Research Council dyspnea scale.

| **Please check the box that applies to you (one box only)** | | |
| --- | --- | --- |
| mMRC Grade 0 | I only get breathless with strenuous exercise |  |
| mMRC Grade 1 | I get short of breath when hurrying on the level or walking up a slight hill |  |
| mMRC Grade 2 | I walk slower than people of the same age on the level because of breathlessness, or I have to stop for breath when walking on my own pace on the level |  |
| mMRC Grade 3 | I stop for breath after walking about 100 meters or after a few minutes on the level |  |
| mMRC Grade 4 | I am too breathless to leave the house or I am breathless when dressing or undressing |  |

Note: Reproduced with permission from Global Initiative for Chronic Obstructive Lung Disease. Global Strategy for Prevention, Diagnosis, and Management of Chronic Obstructive Pulmonary Disease. 2020. <https://goldcopd.org.5>and data from Fletcher.43

**Abbreviations:** mMRC, modified Medical Research Council dyspnea scale.

**Supplementary figures**

**Supplementary figure 1** CAT form.


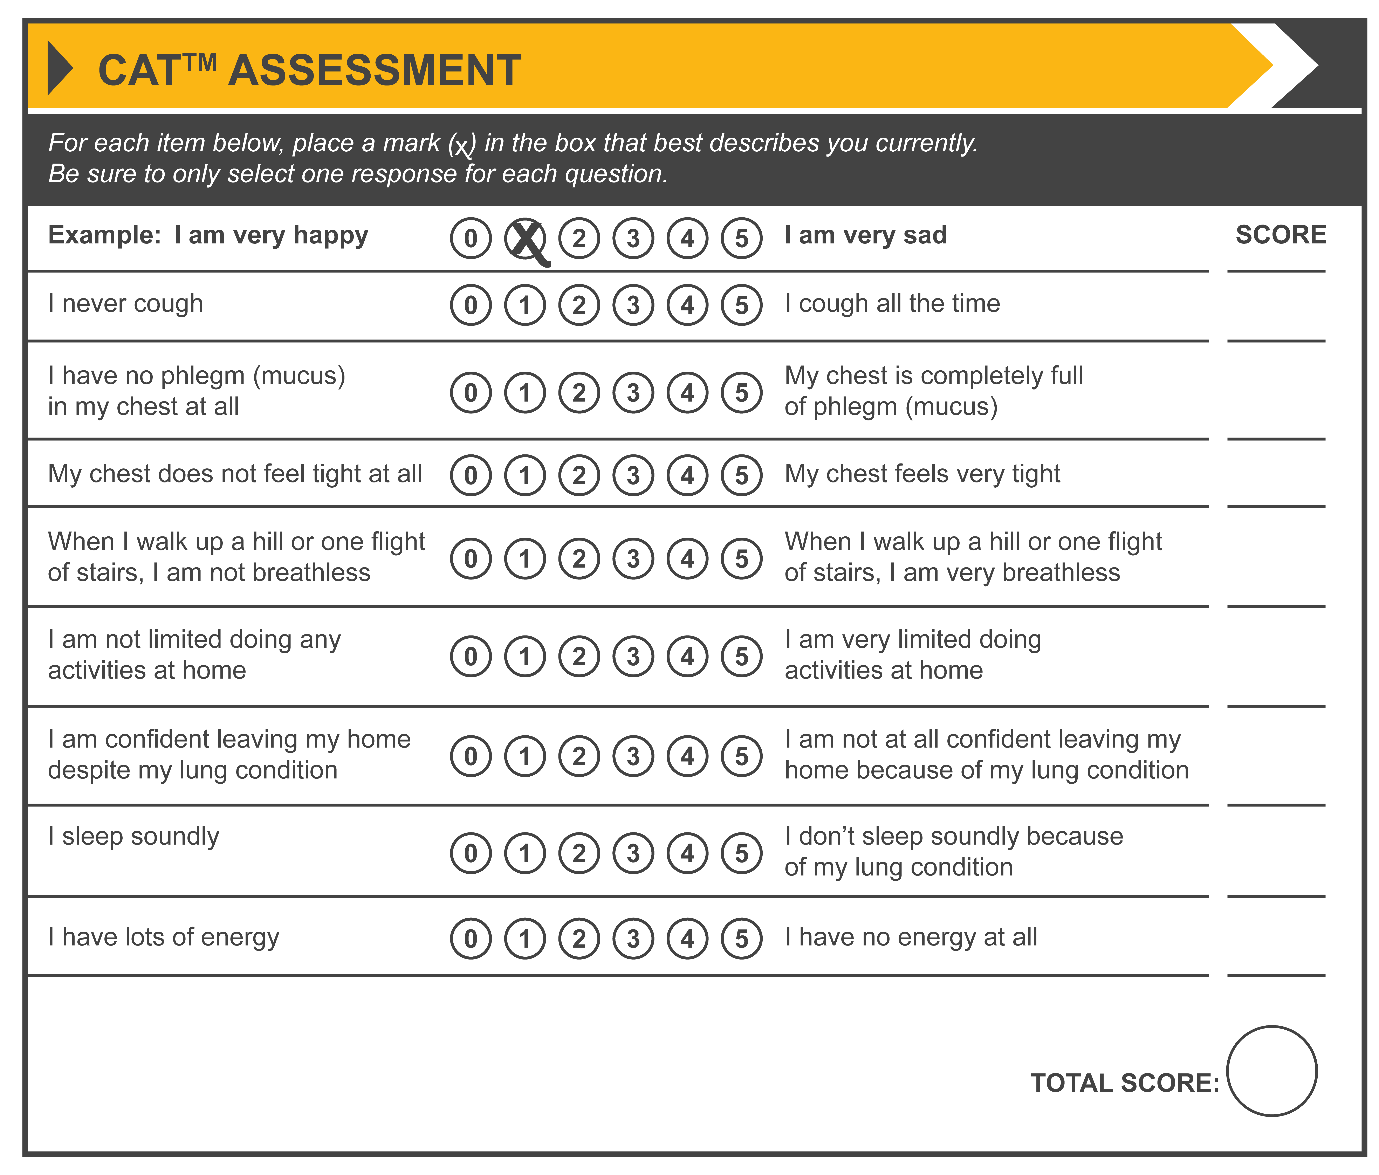


**Note:** Reproduced with permission from Global Initiative for Chronic Obstructive Lung Disease. Global Strategy for Prevention, Diagnosis, and Management of Chronic Obstructive Pulmonary Disease. 2020. <https://goldcopd.org.5>and data from Jones.44

**Abbreviations:** CAT, COPD Assessment Test; COPD, chronic obstructive pulmonary disease.

**Supplementary figure 2** Pursed-lips breathing.


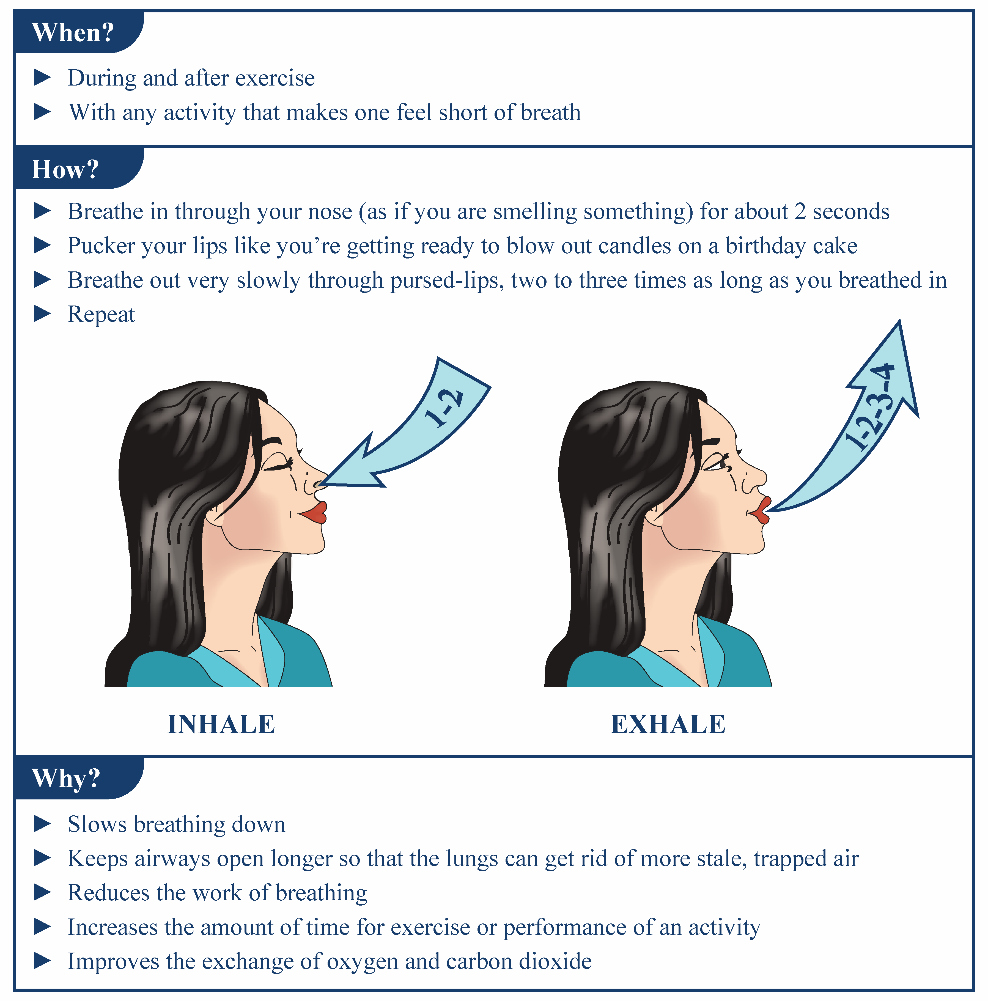


**Note:** Reproduced with permission from COPD Foundation. Breathing Exercises and Techniques. <https://www.copdfoundation.org/Learn-More/I-am-a-Person-with-COPD/Breathing-Techniques.aspx>**.45**

**Supplementary figure 3** COPD Foundation Action Plan.


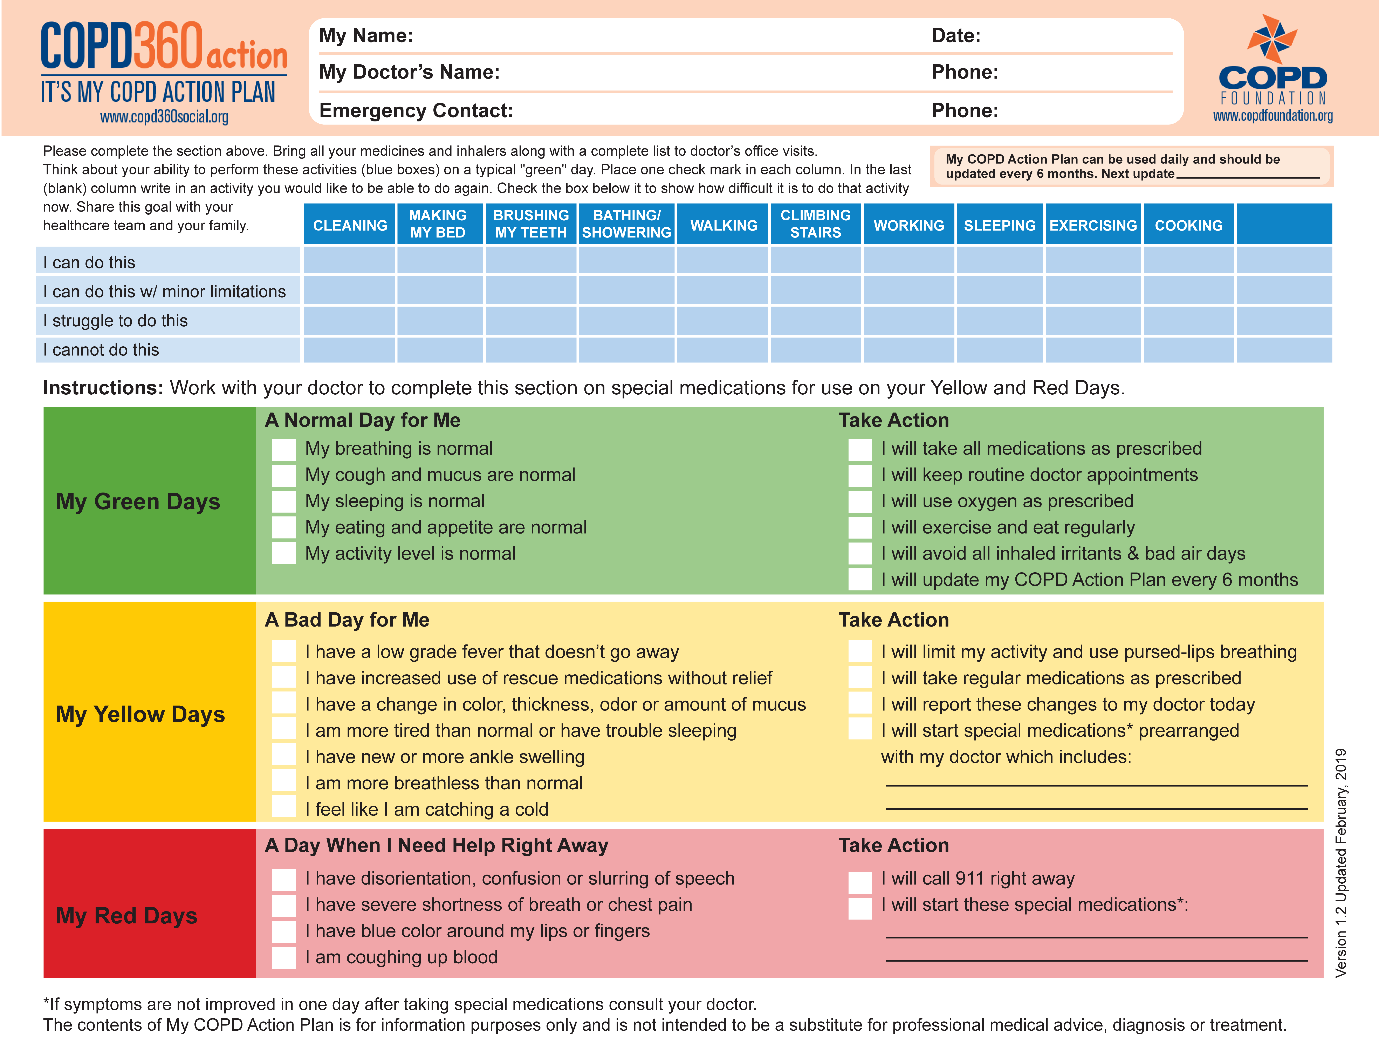


**Note:** Reproduced with permission from COPD Foundation. https://www.copdfoundation.org/Learn-More/Educational-Materials-Resources/Downloads.aspx#MyCOPDActionPlan.38

**Abbreviations:** COPD, chronic obstructive pulmonary disease.
